# Supplementary material for: Graphene oxide based coatings on nitinol for biomedical implant applications: effectively promote mammalian cell growth but kill bacteria
Source: Royal Society of Chemistry journal article supplement (doi:10.1039/c6ra06026a), 2016-01-01
Supplement: c6ra06026a1.pdf [file c6ra06026a1.pdf]

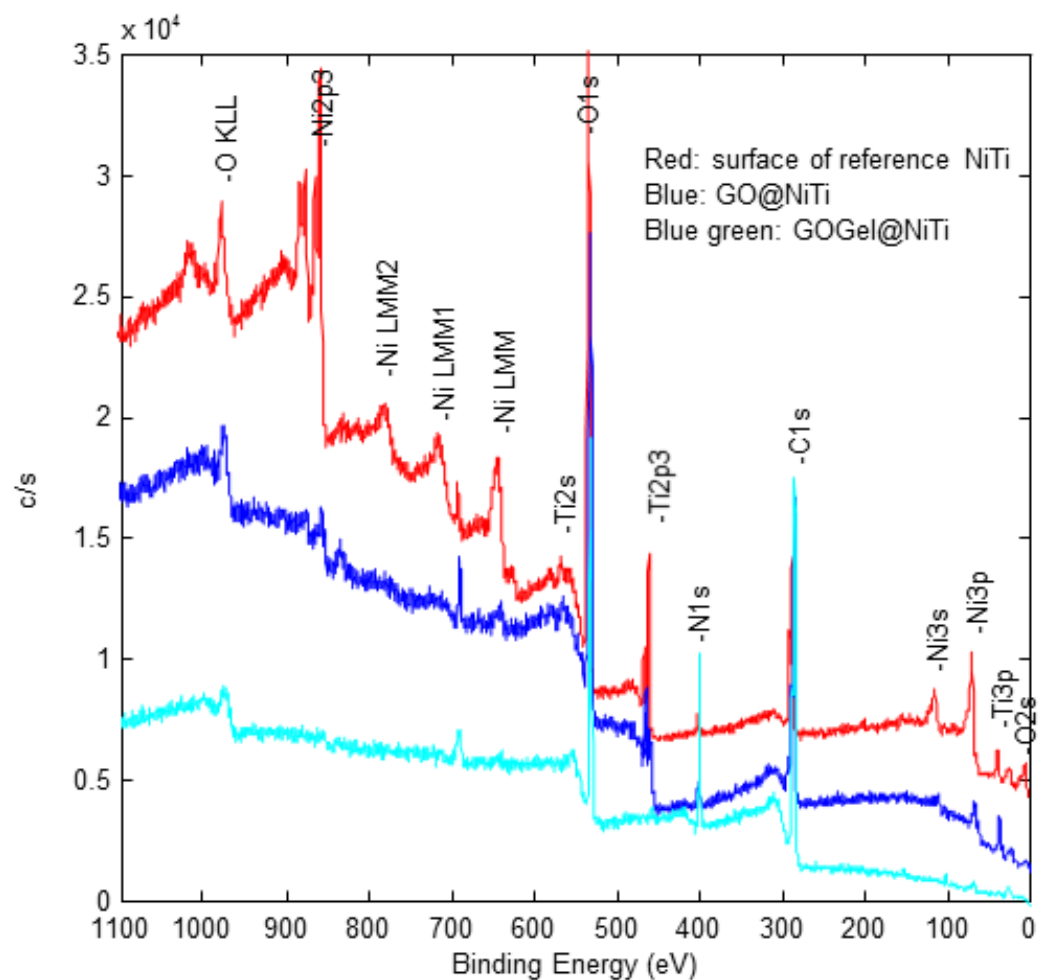

**Fig. S1** Typical XPS survey spectra of GO@NiTi, GOGel@NiTi and NiTi surfaces.

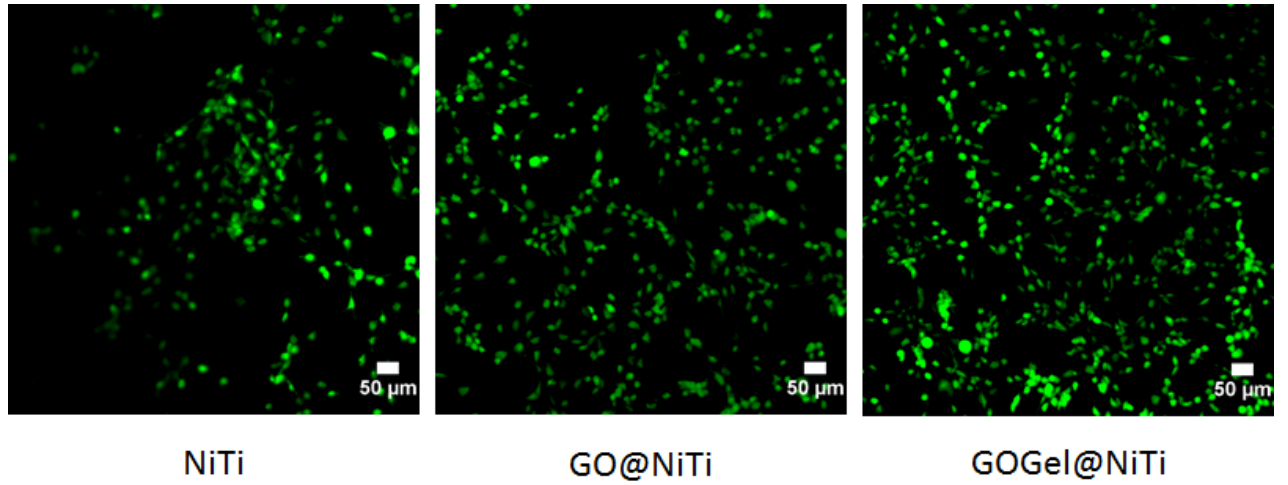

**Fig. S2** Fluorescence images of Viable MC3T3-E1 cells on GO@NiTi, GOGel@NiTi and NiTi surfaces.
